# Supplementary material for: Sensitive Electrochemical Detection of Carcinoembryonic Antigen Based on Biofunctionalized Nanochannel Modified Carbonaceous Electrode
Source: MDPI journal article supplement (doi:10.3390/molecules29040858), 2024-02-15
Supplement: s1 [file s1]

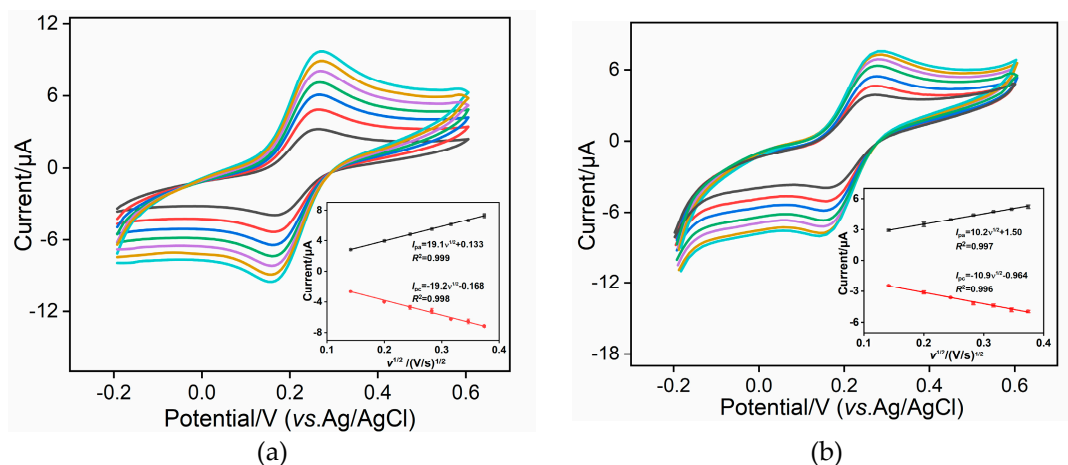

**Figure S1** CV curves obtained on p-GCE (a) and bare GCE (b) at different scan rate (20, 40, 60, 80, 100, 120, 140 mV/s, from ) with 0.5 mM  $\text{K}_3[\text{Fe}(\text{CN})_6]$  containing 0.1 M KCl. The inset is the linear regression curve between peak current vs square root of scan rate derived from the CV curves.

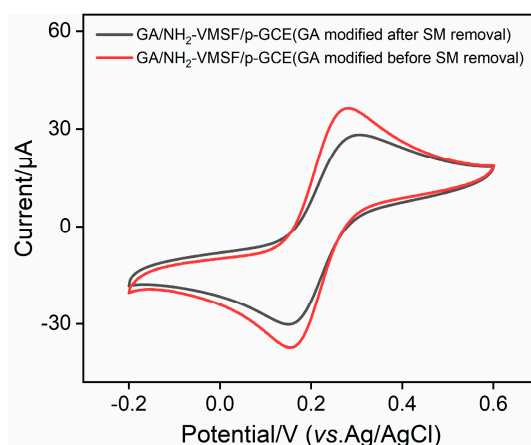

**Figure S2.** CV curves obtained electrodes obtained using GA modification before or after SM removal in 0.1 M KCl containing 2.5 mM  $\text{Fe}(\text{CN})_6^{3/4-}$ .

Table S1. Ratios of C-O, C=O, O-C=O peak area relative to C-C/C=C peak area in different electrode.

| electrode                           | ratios of C-O, C=O, O-C=O peak area relative to C-C/C=C peak area (%) |      |       |
|-------------------------------------|-----------------------------------------------------------------------|------|-------|
|                                     | C-O                                                                   | C=O  | O-C=O |
| GCE                                 | 10.5                                                                  | 5.08 | 6.60  |
| Electrode after anodic polarization | 38.6                                                                  | 6.68 | 5.91  |
| p-GCE                               | 24.6                                                                  | 6.48 | 8.43  |

Table S2. Comparison between CEA detection performance using different method.

| <i>Materials</i>                                                           | <i>Method</i> | <i>Liner range<br/>(ng/mL)</i>    | <i>LOD<br/>(pg/mL)</i> | <i>Ref.</i> |
|----------------------------------------------------------------------------|---------------|-----------------------------------|------------------------|-------------|
| <i>AuNPs-pMCP-Ab<sub>2</sub>/CEA/BSA/<br/>Ab<sub>1</sub>/Au/3D-G/GCE</i>   | SWV           | 0.5-200                           | 310                    | [51]        |
| <i>HPR-Ab/CEA/BSA/lectin/cysteamine/AuNPs<br/>/SPCE</i>                    | CA            | 0.5-10                            | 10                     | [52]        |
| <i>GCE/S-GO/SA-AuNPs/Ab<sub>1</sub>/<br/>CEA/Ab<sub>2</sub>-SA-SNPs-Lu</i> | ECL           | 0.1-5                             | 58                     | [53]        |
| <i>Apt/AuNPs/PDDA-SiO<sub>2</sub>@Fe<sub>3</sub>O<sub>4</sub></i>          | CL            | 0.1–500                           | 32                     | [54]        |
| <i>BSA/Ab/AuNPs/PPYGR/GCE</i>                                              | EIS           | 0.1-10 <sup>3</sup>               | 60                     | [55]        |
| <i>BSA/Ab/tCHI/dPNMA/<br/>SPCE</i>                                         | DPV           | 0.01-30                           | 10                     | [56]        |
| <i>BSA/NH<sub>2</sub>-aptamer/ AuNPs@PDA@<br/>Fe-MOF/GCE</i>               | LSV           | 10 <sup>-6</sup> -10 <sup>3</sup> | 3.3 × 10 <sup>-4</sup> | [57]        |
| <i>BSA/Ab/GA/NH<sub>2</sub>-VMSF/<br/>p-GCE</i>                            | DPV           | 0.01-100                          | 6.3                    | This work   |

AuNPs, gold nanoparticles; pMCP, poly-m-Cresol purple; Ab<sub>2</sub>, the secondary anti-CEA; BSA, bovine serum albumin; Ab<sub>1</sub>, the first anti-CEA; 3D-G, three dimensional graphene; GCE, glassy carbon electrode; SWV, square wave voltammetry; HPR-Ab, horseradish peroxidase-labeled anti-CEA; GA, Chronoamperometric; SPCE, screen-printed carbon electrodes; PDA, self-polymerized dopamine; MOF, metal-organic frameworks; LSV, linear sweep voltammetry; S-GO, thiolated graphene oxide; SA-AuNPs, streptavidin-coated gold nanoparticles; SA-SNPs-Lu, silver NPs coated with luminol and streptavidin; ECL, electrochemiluminescence; Apt, aptamer; PDDA, polydiallyl dimethylammonium chloride; CL, chemiluminescence; PPYGR, poly(ethyleneglycol)-NH<sub>2</sub>/pyrenebutyric acid functionalized graphene; EIS, electrochemical impedance spectroscopy; tCHI, 11-mercaptopundecanoic acid grafted chitosan; dPNMA, doped poly(N-methylaniline).
